# Supplementary material for: The Integrated Health Monitor COVID-19: A Protocol for a Comprehensive Assessment of the Short- and Long-Term Health Impact of the Pandemic in the Netherlands
Source: MDPI journal article supplement (doi:10.3390/mps6060117), 2023-12-02
Supplement: s1 [file s1]

### Supplementary material: outcome parameters

Table S1: Included outcome parameters in the surveys (GGD Health Monitor and/or Panel Surveys)

|                                                                        |
|------------------------------------------------------------------------|
| Perceived Health                                                       |
| Happiness                                                              |
| Psychosocial health/psychological symptoms                             |
| Suicidal thoughts                                                      |
| Social support                                                         |
| Social interaction                                                     |
| Resilience                                                             |
| Loneliness                                                             |
| Outlook on the future                                                  |
| Stress                                                                 |
| Events experienced during the pandemic                                 |
| PTSD symptoms                                                          |
| Lifestyle                                                              |
| Substance use: tobacco, alcohol, other drugs                           |
| Impact of the pandemic: negative, positive, in what ways?              |
| Physical symptoms: non-specific physical symptoms, long-covid symptoms |
| Delayed care                                                           |
| Need for care and support                                              |

When possible, these concepts are measured with validated instruments.

Table S2: Included ICPC-codes short-cycle general practitioners registry analysis

| Complaint/condition            | ICPC code(s)          |
|--------------------------------|-----------------------|
| Fatigue*                       | A04                   |
| Nausea                         | D09                   |
| Pain or pressure in the chest* | K01 + K02 + K03       |
| Heart palpitations*            | K04                   |
| Muscle soreness*               | L18                   |
| Headache*                      | N01 + N02             |
| Dizziness/lightheadedness      | N17                   |
| Feeling anxious/nervous/tense  | P01                   |
| Acute stress reaction          | P02                   |
| Feeling depressed/down         | P03                   |
| Sleep disturbance              | P06                   |
| Memory disturbance*            | P20                   |
| Respiratory problems*          | R02 + R03 + R04 + R29 |
| Disturbance of taste and smell | N16                   |

\* Symptoms possibly related to long-covid

Table S3: Included variables in long-cycle general practitioners registry analysis

| Complaints/condition | ICPC code(s)          |
|----------------------|-----------------------|
| Respiratory problems | R02 + R03 + R04 + R29 |
| Mental symptoms      | P01 + P02 + P03       |
| Coughing             | R05                   |
| Headache             | N01 + N02             |
| Fatigue              | A04                   |
| Nausea               | D09                   |
| Memory disturbance   | P20                   |
| Dizziness            | D09                   |

|                                                                                              |                                                                                                                                                                                                                                                                                                                                                               |
|----------------------------------------------------------------------------------------------|---------------------------------------------------------------------------------------------------------------------------------------------------------------------------------------------------------------------------------------------------------------------------------------------------------------------------------------------------------------|
| Sleep disturbance                                                                            | P06                                                                                                                                                                                                                                                                                                                                                           |
| Irritability/anger issues                                                                    | P04                                                                                                                                                                                                                                                                                                                                                           |
| Suicidality (thoughts, attempts and completed suicides)                                      | P77                                                                                                                                                                                                                                                                                                                                                           |
| Disturbance of taste and smell                                                               | N16                                                                                                                                                                                                                                                                                                                                                           |
| Cluster weight change                                                                        | T07 + T08                                                                                                                                                                                                                                                                                                                                                     |
| Obesity                                                                                      | T82                                                                                                                                                                                                                                                                                                                                                           |
| Anxiety                                                                                      | P01 + P74                                                                                                                                                                                                                                                                                                                                                     |
| Depression                                                                                   | P03 + P76                                                                                                                                                                                                                                                                                                                                                     |
| Problems with education                                                                      | Z07                                                                                                                                                                                                                                                                                                                                                           |
| Loneliness                                                                                   | Z04                                                                                                                                                                                                                                                                                                                                                           |
| Problems with the accessibility of care                                                      | Z10                                                                                                                                                                                                                                                                                                                                                           |
| Social problems                                                                              | Z01 + Z03 + Z04 + Z05 + Z06 + Z07 + Z10 + Z12                                                                                                                                                                                                                                                                                                                 |
| Suicide                                                                                      | n.a. (CBS microdata does not contain ICPC codes)                                                                                                                                                                                                                                                                                                              |
| <b>Medication prescriptions</b>                                                              | <b>ATC code</b>                                                                                                                                                                                                                                                                                                                                               |
| Antidepressants                                                                              | N06A                                                                                                                                                                                                                                                                                                                                                          |
| Anxiolytics                                                                                  | N05B                                                                                                                                                                                                                                                                                                                                                          |
| Antipsychotics                                                                               | N05A                                                                                                                                                                                                                                                                                                                                                          |
| Painkillers                                                                                  | N02B                                                                                                                                                                                                                                                                                                                                                          |
| <b>Healthcare usage</b>                                                                      |                                                                                                                                                                                                                                                                                                                                                               |
| GP practice support mental healthcare (POH-GGZ)                                              |                                                                                                                                                                                                                                                                                                                                                               |
| Consults shorter than 5 minutes                                                              |                                                                                                                                                                                                                                                                                                                                                               |
| Consults between 5 and 20 minutes                                                            |                                                                                                                                                                                                                                                                                                                                                               |
| Consults longer than 20 minutes                                                              |                                                                                                                                                                                                                                                                                                                                                               |
| Regular house visits shorter than 20 minutes                                                 |                                                                                                                                                                                                                                                                                                                                                               |
| Regular house visits longer than 20 minutes                                                  |                                                                                                                                                                                                                                                                                                                                                               |
| <b>Potentially vulnerable groups</b>                                                         | <b>Definition</b>                                                                                                                                                                                                                                                                                                                                             |
| People with pre-existing mental conditions                                                   | Patient registered with one of the following ICPC codes in 2019 and/or 2020: P01 P02 P03 P04 P15 P18 P19 P28 P29 P71 P72 P73 P74 P76 P77 P78 P79 P80 P98 P99                                                                                                                                                                                                  |
| People with pre-existing chronic diseases/conditions and pre-existing physical comorbidities | Patient registered with one of the following ICPC codes in 2019 and/or 2020: T90 R83 R88 R89 R91 R95 R96 A79, B72, B73, B74, D74, D75, D76, D77, F74.01, H75.01, K72.01, L71.01, N74, R84, R85, S77, T71, U75, U76, U77, W72, X75, X76, X77, Y77, Y78, K28, K73, K74, K75, K76, K77, K78, K79, K80, K81, K82, K83, K84, T82 (HIV + immunodeficiency), B90 T99 |
| People experiencing social problems                                                          | Patient registered with one of the following ICPC codes in 2019 and/or 2020: Z04 Z05 Z07 Z10 Z12 Z16 Z20 Z21 Z24 Z25 (NZR data)                                                                                                                                                                                                                               |
| Children and young adults                                                                    | 0-25 years old                                                                                                                                                                                                                                                                                                                                                |
| Gender                                                                                       | Women compared to men                                                                                                                                                                                                                                                                                                                                         |
| People with a low socioeconomic status                                                       | Definition used by CBS: those under the low-income limit. <a href="https://www.cbs.nl/en-gb/our-services/methods/definitions/low-income">https://www.cbs.nl/en-gb/our-services/methods/definitions/low-income</a>                                                                                                                                             |
| People with a migration background                                                           | Definition used by CBS: <a href="https://www.cbs.nl/en-gb/our-services/methods/definitions/migration-background">https://www.cbs.nl/en-gb/our-services/methods/definitions/migration-background</a>                                                                                                                                                           |
